# Supplementary material for: Synthesis, structure and dioxygen reactivity of a bis(µ-iodo)dicopper(i) complex supported by the [N-(3,5-di-tert-butyl-2-hydroxybenzyl)-N,N-di-(2-pyridylmethyl)]amine ligand
Source: Royal Society of Chemistry journal article supplement (doi:10.1039/b513898a), 2006-01-01
Supplement: b513898a.pdf [file b513898a.pdf]

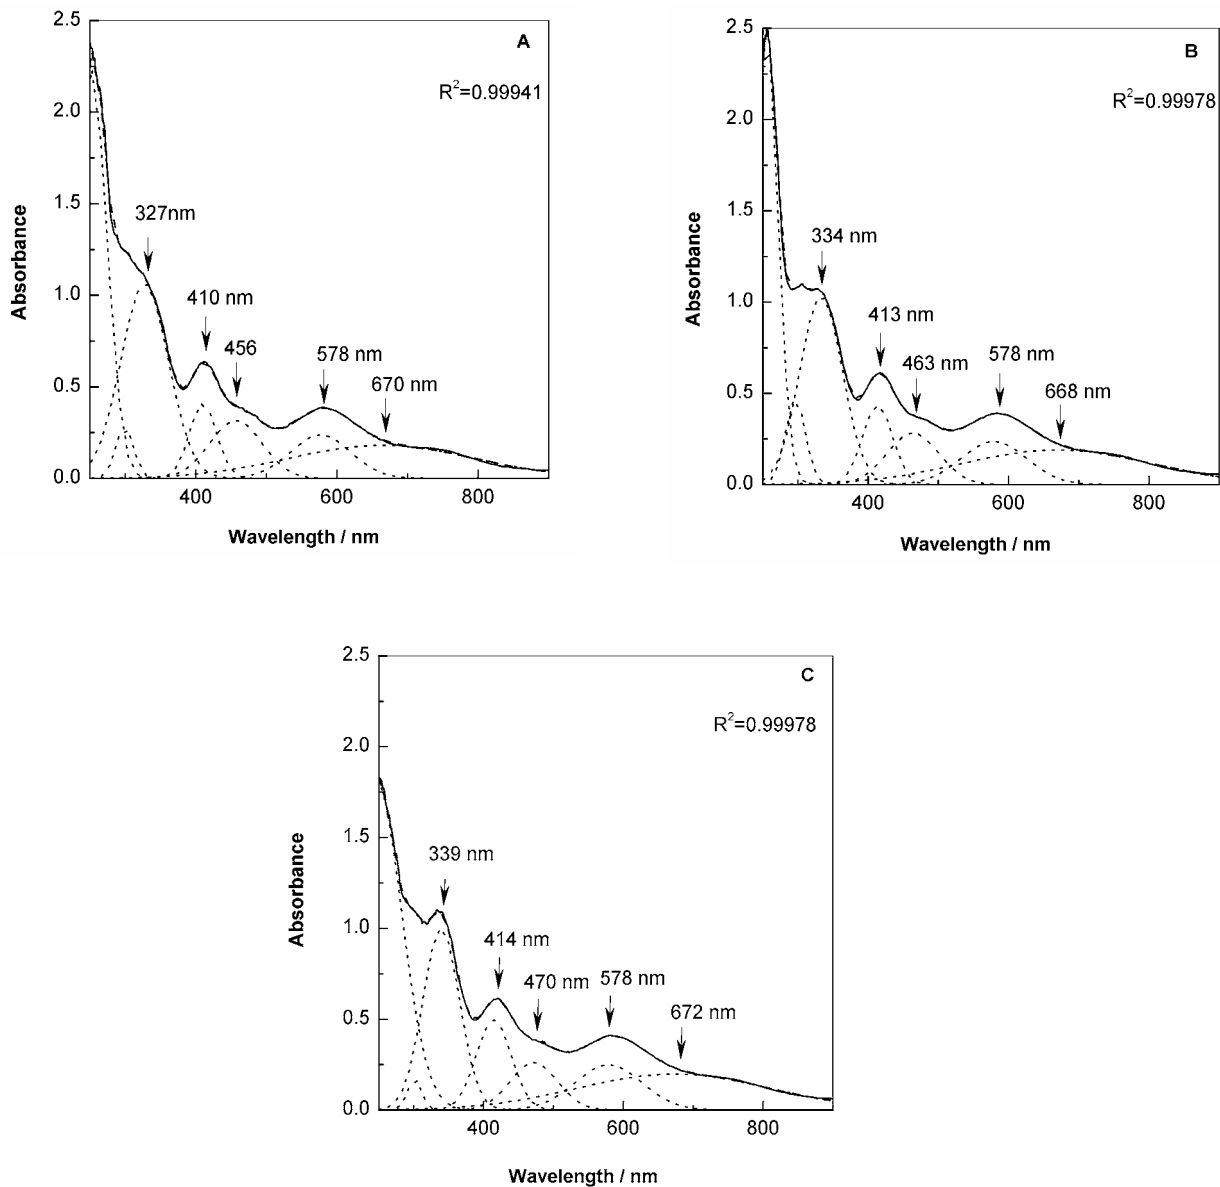

**Fig. S1** Optical absorption spectra of species 2 in  $\text{CH}_2\text{Cl}_2$  generated at (A) 193K, (B) 243 (C) 263 K (solid line). The spectra fitting (dotted line) was performed with Fit Multi-peaks Gaussian model by using the Origin 6.0 Professional Microcal Software.

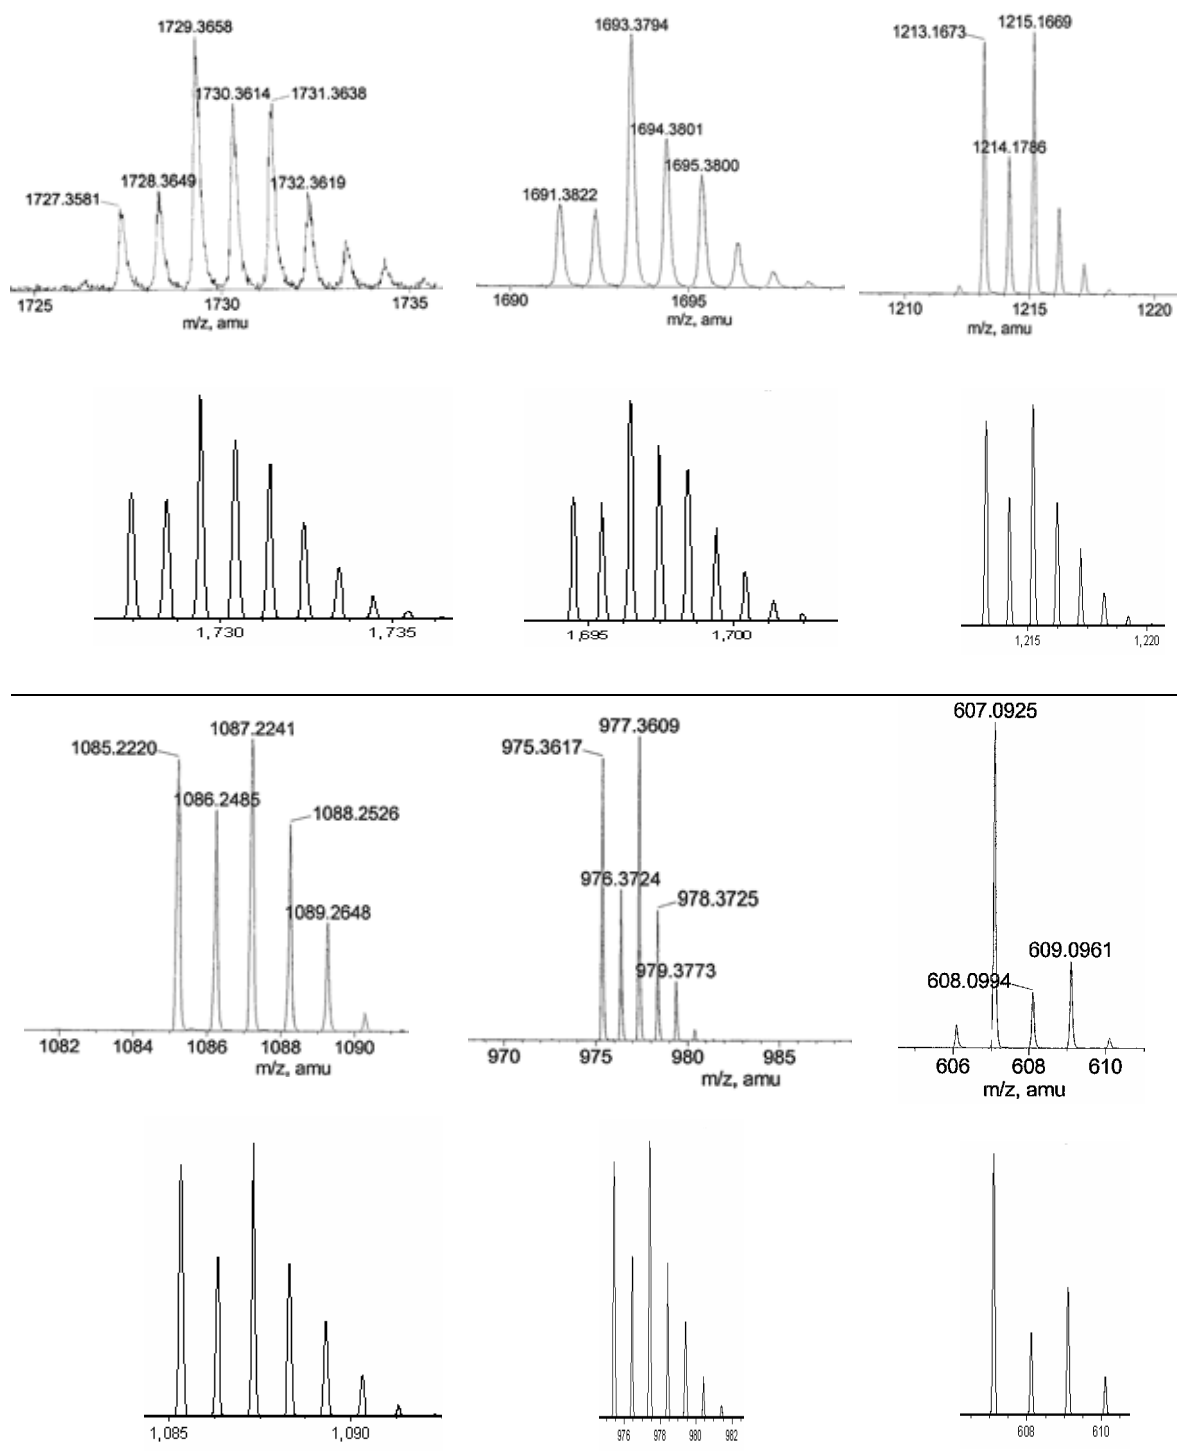

**Fig. S2** Sections of TOF-MS (top) and simulation (bottom) for the oxygenated species **2** showing the observed and calculated distribution isotope patterns for positive ion clusters.

**Table S-1.** Selected bond distances (Å) and angles (°) for [Cu(L)Cl]Cl·2CHCl<sub>3</sub> (**4**·2CHCl<sub>3</sub>).

---

|              |            |               |           |
|--------------|------------|---------------|-----------|
| Cu-Cl(1)     | 2.2441(7)  | Cu-N(2)       | 1.983(2)  |
| Cu-N(1)      | 2.0364(19) | Cu-N(3)       | 1.982(2)  |
| Cu-O(1)      | 2.460(5)   | Cu-Cl(18)     | 4.524     |
| <br>         |            |               |           |
| N(3)-Cu-N(2) | 165.06(9)  | N(3)-Cu-Cl(1) | 96.47(6)  |
| N(3)-Cu-N(1) | 82.08(8)   | N(2)-Cu-Cl(1) | 97.36(6)  |
| N(2)-Cu-N(1) | 83.70(8)   | N(1)-Cu-Cl(1) | 175.52(6) |

---
